# Supplementary material for: Integrating machine learning and single-cell sequencing to reveal the role of kinase-related genes in subtype classification and prognostic significance of lung squamous cell carcinoma
Source: Research Square preprint supplement (doi:10.21203/rs.3.rs-6477524/v1), 2025-09-24
Supplement: Supplementary file 1 [file 4f3863d5a754205cb2cc07a2.xlsx]

## Sheet: Sheet1
Name	Univariate analysis				Multivariate analysis
	HR	HR.95L	HR.95H	pvalue	HR	HR.95L	HR.95H	pvalue
ROS1	1.16026	1.0396	1.29493	0.00917335	1.06294	0.936659	1.20625	0.344193
ACVRL1	1.31082	1.07949	1.59173	0.00687577	1.04834	0.805441	1.36449	0.725559
LATS2	1.42448	1.11998	1.81178	0.00413685	1.13328	0.82001	1.56622	0.448516
CHEK2	0.652748	0.520585	0.818464	0.000218221	0.738722	0.565889	0.964342	0.0259492

## Sheet: Sheet2
Tag	HR	Lower	Upper	Likelihood	logrank	Wald
CHEK2	0.652748	0.520585	0.818464	0.000218221	0.000215199	0.0002195
LATS2	1.42448	1.11998	1.81178	0.00413685	0.00402822	0.00393451
ACVRL1	1.31082	1.07949	1.59173	0.00687577	0.00634748	0.00629437
FLT4	1.42546	1.10174	1.84431	0.00799763	0.00693332	0.00699448
ROS1	1.16026	1.0396	1.29493	0.00917335	0.00777347	0.00797528
VRK1	0.757834	0.612632	0.937451	0.0103992	0.0106466	0.0106141
LRRK2	1.15703	1.02139	1.31068	0.0261761	0.0215472	0.0218707
CDKL2	1.36303	1.01434	1.83158	0.0469438	0.039784	0.0399347
CHEK1	0.780551	0.605072	1.00692	0.0578852	0.0565539	0.0565369
PAK1	0.870471	0.726253	1.04333	0.132229	0.133219	0.133352
PRKCZ	1.22882	0.937941	1.60992	0.139958	0.135147	0.134888
CAMK2A	1.44302	0.860981	2.41851	0.189512	0.162722	0.163961
MYLK3	1.45409	0.527807	4.00595	0.493783	0.467508	0.469026
