# Supplementary material for: Integrating machine learning and single-cell sequencing to reveal the role of kinase-related genes in subtype classification and prognostic significance of lung squamous cell carcinoma
Source: Research Square preprint supplement (doi:10.21203/rs.3.rs-6477524/v1), 2025-09-24
Supplement: Supplementary file 3 [file c136a68d9ab6b22ffee7da18.xlsx]

## Sheet: Sheet1
kinase-related genes (KRGs)
AKT1
AKT2
AKT3
CIT
CDC42BPA
CDC42BPB
CDC42BPG
DMPK
ROCK1
ROCK2
GRK2
GRK3
GRK1
GRK4
GRK5
GRK6
GRK7
MAST1
MAST2
MAST3
MAST4
MASTL
LATS1
LATS2
STK38
STK38L
PDPK1
PRKACA
PRKACB
PRKACG
PRKX
PRKY
PRKCA
PRKCB
PRKCG
PRKCD
PRKCQ
PRKCE
PRKCH
PRKCI
PRKCZ
PRKG1
PRKG2
PKN1
PKN2
PKN3
RPS6KA4
RPS6KA5
RPS6KB1
RPS6KB2
RPS6KA1
RPS6KA2
RPS6KA3
RPS6KA6
RPS6KC1
RPS6KL1
RSKR
SGK1
SGK2
SGK3
STK32A
STK32B
STK32C
ADCK3
ADCK4
ADCK1
ADCK2
ADCK5
ALPK1
ALPK2
ALPK3
TRPM6
TRPM7
EEF2K
BAZ1A
BAZ1B
ABR
BCR
BLVRA
BRD2
BRD3
BRD4
BRDT
CERT1
FASTK
STK19
GTF2F1
BCKDK
PDK1
PDK2
PDK3
PDK4
ATM
ATR
PRKDC
MTOR
SMG1
TRRAP
RIOK1
RIOK2
RIOK3
TAF1
TAF1L
TRIM24
TRIM28
TRIM33
TRIM66
CAMK1
CAMK1D
CAMK1G
CAMK4
PNCK
CAMK2A
CAMK2B
CAMK2D
CAMK2G
PRKAA1
PRKAA2
BRSK1
BRSK2
CHEK1
HUNK
STK11
MARK1
MARK2
MARK3
MARK4
MELK
NIM1
NUAK1
NUAK2
PASK
SIK1
SIK2
SIK3
SNRK
CAMKV
CASK
DAPK1
DAPK2
DAPK3
STK17A
STK17B
DCLK1
DCLK2
DCLK3
MAPKAPK2
MAPKAPK3
MAPKAPK5
MKNK1
MKNK2
MYLK
MYLK2
MYLK3
MYLK4
TTN
PHKG1
PHKG2
PIM1
PIM2
PIM3
PRKD1
PRKD2
PRKD3
PSKH1
PSKH2
CHEK2
STK40
STK33
TRIB1
TRIB2
TRIB3
KALRN
TRIO
OBSCN
SPEG
TSSK1B
TSSK2
TSSK3
TSSK4
TSSK6
CSNK1A1
CSNK1A1L
CSNK1D
CSNK1E
CSNK1G1
CSNK1G2
CSNK1G3
TTBK1
TTBK2
VRK1
VRK2
VRK3
CDK20
CDK1
CDK10
CDK11A
CDK11B
CDK2
CDK3
CDK4
CDK6
CDK5
CDK7
CDK19
CDK8
CDK9
CDK12
CDK13
CDK16
CDK17
CDK18
CDK14
CDK15
CDKL1
CDKL2
CDKL3
CDKL4
CDKL5
CSNK2A1
CSNK2A2
CLK1
CLK2
CLK3
CLK4
DYRK1A
DYRK1B
DYRK2
DYRK3
DYRK4
HIPK1
HIPK2
HIPK3
HIPK4
PRPF4B
GSK3A
GSK3B
MAPK1
MAPK3
MAPK4
MAPK6
MAPK7
MAPK15
MAPK10
MAPK8
MAPK9
NLK
MAPK11
MAPK12
MAPK13
MAPK14
CILK1
MAK
MOK
SRPK1
SRPK2
SRPK3
NME1
NME2
NME3
NME4
NME5
NME6
NME7
NME9
NME8
AURKA
AURKB
AURKC
BUB1
BUB1B
TP53RK
CAMKK1
CAMKK2
CDC7
DSTYK
HASPIN
CHUK
IKBKB
IKBKE
TBK1
ERN1
ERN2
UHMK1
MOS
AAK1
BMP2K
GAK
STK16
NEK1
NEK3
NEK5
NEK10
NEK11
NEK2
NEK4
NEK6
NEK7
NEK8
NEK9
SBK1
SBK2
SBK3
PINK1
PEAK1
PRAG1
PDIK1L
STK35
TEX14
NRBP1
NRBP2
RNASEL
SGK196
STK31
PAN3
EIF2AK4
EIF2AK1
EIF2AK3
EIF2AK2
PLK1
PLK2
PLK3
PLK4
SCYL1
SCYL2
SCYL3
C9orf96
PKDCC
PXK
TBCK
TLK1
TLK2
PBK
TTK
STK36
ULK1
ULK2
ULK3
ULK4
PIK3R4
PKMYT1
WEE2-AS1
WEE1
WNK1
WNK2
WNK3
WNK4
FAM198A
FAM198B
FAM20A
FAM20B
FAM20C
FJX1
GUCY2C
GUCY2D
GUCY2F
NPR1
NPR2
MAP3K15
MAP3K5
MAP3K6
MAP3K1
YSK4
MAP3K2
MAP3K3
MAP3K4
OXSR1
STK39
MAP4K1
MAP4K2
MAP4K3
MAP4K5
MAP4K4
MINK1
NRK
TNIK
STK3
STK4
MYO3A
MYO3B
PAK1
PAK2
PAK3
PAK4
PAK6
PAK5
SLK
STK10
STRADA
STRADB
TAOK1
TAOK2
TAOK3
MST4
STK24
STK25
MAP2K1
MAP2K2
MAP2K3
MAP2K6
MAP2K4
MAP2K5
MAP2K7
MAP3K14
MAP3K8
ABL1
ABL2
TNK1
TNK2
ALK
LTK
AXL
MERTK
TYRO3
PTK7
CSK
MATK
DDR1
DDR2
EGFR
ERBB2
ERBB3
ERBB4
EPHA1
EPHA10
EPHA2
EPHA3
EPHA4
EPHA5
EPHA6
EPHA7
EPHA8
EPHB1
EPHB2
EPHB3
EPHB4
EPHB6
PTK2
PTK2B
FER
FES
FGFR1
FGFR2
FGFR3
FGFR4
IGF1R
INSR
INSRR
JAK1
JAK2
JAK3
TYK2
AATK
LMTK2
LMTK3
MET
MST1R
MUSK
CSF1R
FLT3
KIT
PDGFRA
PDGFRB
RET
ROR1
ROR2
RYK
ROS1
FRK
FGR
FYN
SRC
YES1
BLK
HCK
LCK
LYN
PTK6
SRMS
SYK
ZAP70
BMX
BTK
ITK
TEC
TXK
TEK
TIE1
STYK1
NTRK1
NTRK2
NTRK3
FLT1
FLT4
KDR
IRAK1
IRAK2
IRAK3
IRAK4
LIMK1
LIMK2
TESK1
TESK2
LRRK1
LRRK2
TNNI3K
ILK
MAP3K12
MAP3K13
MAP3K21
MAP3K10
MAP3K11
MAP3K9
MAP3K7
MAP3K20
KSR1
KSR2
ARAF
BRAF
RAF1
ANKK1
RIPK1
RIPK2
RIPK3
RIPK4
ACVR1
ACVR1B
ACVR1C
ACVRL1
BMPR1A
BMPR1B
TGFBR1
ACVR2A
ACVR2B
AMHR2
BMPR2
TGFBR2
MLKL
